# Supplementary material for: Electrochemical Characterization of Magnetite (Fe3O4) Nanoaggregates in Acidic and Alkaline Solutions
Source: PubMed Central journal article supplement — ACS Omega. 2021 Oct 5;6(41):26880–7. doi: 10.1021/acsomega.1c03142 (PMC8529599; doi:10.1021/acsomega.1c03142), 2021-10-05
Supplement: ao1c03142_si_001.pdf [file ao1c03142_si_001.pdf]

# Supporting information

## Electrochemical characterization of magnetite (Fe<sub>3</sub>O<sub>4</sub>) nano-aggregates in acidic and alkaline solutions

*Alessandra Accogli<sup>a</sup>, Luca Bertol<sup>a</sup>, Gabriele Panzer<sup>a</sup>, Eugenio Gibertini<sup>a</sup>, Ruggiero Pesce<sup>a</sup>,*

*Gianlorenzo Bussetti<sup>b</sup>, Luca Magagnin<sup>a,\*</sup>*

<sup>a</sup> Dipartimento di Chimica, Materiali e Ingegneria Chimica Giulio Natta  
Politecnico di Milano, 20131 Milano, Italy

<sup>b</sup> Dipartimento di Fisica, Politecnico di Milano, 20133 Milano, Italy

\* Corresponding author: [luca.magagnin@polimi.it](mailto:luca.magagnin@polimi.it)

### Calculation of the active particles percentage.

The actual percentage of electroactive particles was evaluated from the ratio between the experimental charge, from the CV analysis (in A·s) and the theoretical charge, from the loading of particles onto the GC electrode for the supported case or into the solution for the dispersed case. The theoretical charge is calculated according to the Faraday law, here reported as:

$$Q_{th} = mnF \quad \text{Eq. (S1)}$$

Where  $Q_{th}$  is the charge in A·s,  $m$  is the number of moles of active particles,  $n$  is the number of electrons exchanged in the reaction ( $n = 1, 1$ ) while  $F$  is the Faraday constant in C mol<sup>-1</sup>.

The experimental charge on the other hand is calculated by the integration of the anodic peak from the CV analysis, as follows:

$$Q_{exp} = \frac{1}{v} \int_{V_i}^{V_f} I(V) dV \quad \text{Eq. (S2)}$$

Where  $Q_{exp}$  is the charge in A·s,  $v$  is the scan rate in V s<sup>-1</sup>,  $V_i$  and  $V_f$  are the potential limitations for the integration of the peak in V and  $I(V)$  is the instantaneous current in A.

<http://doi.wiley.com/10.1002/celc.201402012>.
